# Supplementary material for: Evaluation of updated nitric acid chemistry on ozone precursors and radiative effects
Source: Copernicus journal article supplement (doi:10.5194/acp-15-5973-2015), 2015-05-29
Supplement: Supplementary file 7 [file acp-15-5973-2015-supplement.zip]

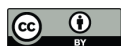

## *Supplement of*

# **Evaluation of updated nitric acid chemistry on ozone precursors and radiative effects**

**K. M. Seltzer et al.**

*Correspondence to:* K. M. Seltzer (karlseltzer@gmail.com) and B. H. Henderson (barronh@ufl.edu)

- acp-15-5973-2015-supplement-cover-letter.pdf
- HNO3\_binned.pdf
- HNO3divNOy\_binned.pdf
- NOx\_binned.pdf
- NOxdivNOy\_binned.pdf
- NOy\_binned.pdf
- O3\_binnedNew.pdf
- PAN\_binned.pdf
- PANdivNOy\_binned.pdf
- \_\_MACOSX
  - .\_HNO3\_binned.pdf
  - .\_HNO3divNOy\_binned.pdf
  - .\_NOx\_binned.pdf
  - .\_NOxdivNOy\_binned.pdf
  - .\_NOy\_binned.pdf
  - .\_O3\_binnedNew.pdf
  - .\_PAN\_binned.pdf
  - .\_PANdivNOy\_binned.pdf
  - .\_horizontal.pdf
  - .\_lightning\_profile.pdf
  - .\_ozone\_TOA\_difference\_plot.png
  - .\_ozone\_atmospheric\_difference\_plot.png

- .\_ozone\_surface\_difference\_plot.png
- .\_spatial\_hno3\_plot.png
- .\_spatial\_nox\_plot.png
- .\_spatial\_ozone\_plot.png
- .\_spatial\_sulfate\_plot.png
- .\_spatial\_vertical\_hno3\_plot.png
- .\_spatial\_vertical\_nox\_plot.png
- .\_spatial\_vertical\_ozone\_plot.png
- .\_spatial\_vertical\_sulfate\_plot.png
- .\_sulfate\_TOA\_difference\_plot.png
- .\_sulfate\_atmospheric\_difference\_plot.png
- .\_sulfate\_surface\_difference\_plot.png
- .\_total\_TOA\_difference\_plot.png
- .\_total\_atmospheric\_difference\_plot.png
- .\_total\_surface\_difference\_plot.png
- horizontal.pdf
- lightning\_profile.pdf
- ozone\_TOA\_difference\_plot.png
- ozone\_atmospheric\_difference\_plot.png
- ozone\_surface\_difference\_plot.png
- spatial\_hno3\_plot.png
- spatial\_nox\_plot.png
- spatial\_ozone\_plot.png
- spatial\_sulfate\_plot.png
- spatial\_vertical\_hno3\_plot.png
- spatial\_vertical\_nox\_plot.png
- spatial\_vertical\_ozone\_plot.png
- spatial\_vertical\_sulfate\_plot.png
- sulfate\_TOA\_difference\_plot.png
- sulfate\_atmospheric\_difference\_plot.png
- sulfate\_surface\_difference\_plot.png
- total\_TOA\_difference\_plot.png
- total\_atmospheric\_difference\_plot.png
- total\_surface\_difference\_plot.png

The copyright of individual parts of the supplement might differ from the CC-BY 3.0 licence.
