# Supplementary figures and images for: Evaluation of updated nitric acid chemistry on ozone precursors and radiative effects
Source: Copernicus journal article supplement (doi:10.5194/acp-15-5973-2015), 2015-05-29

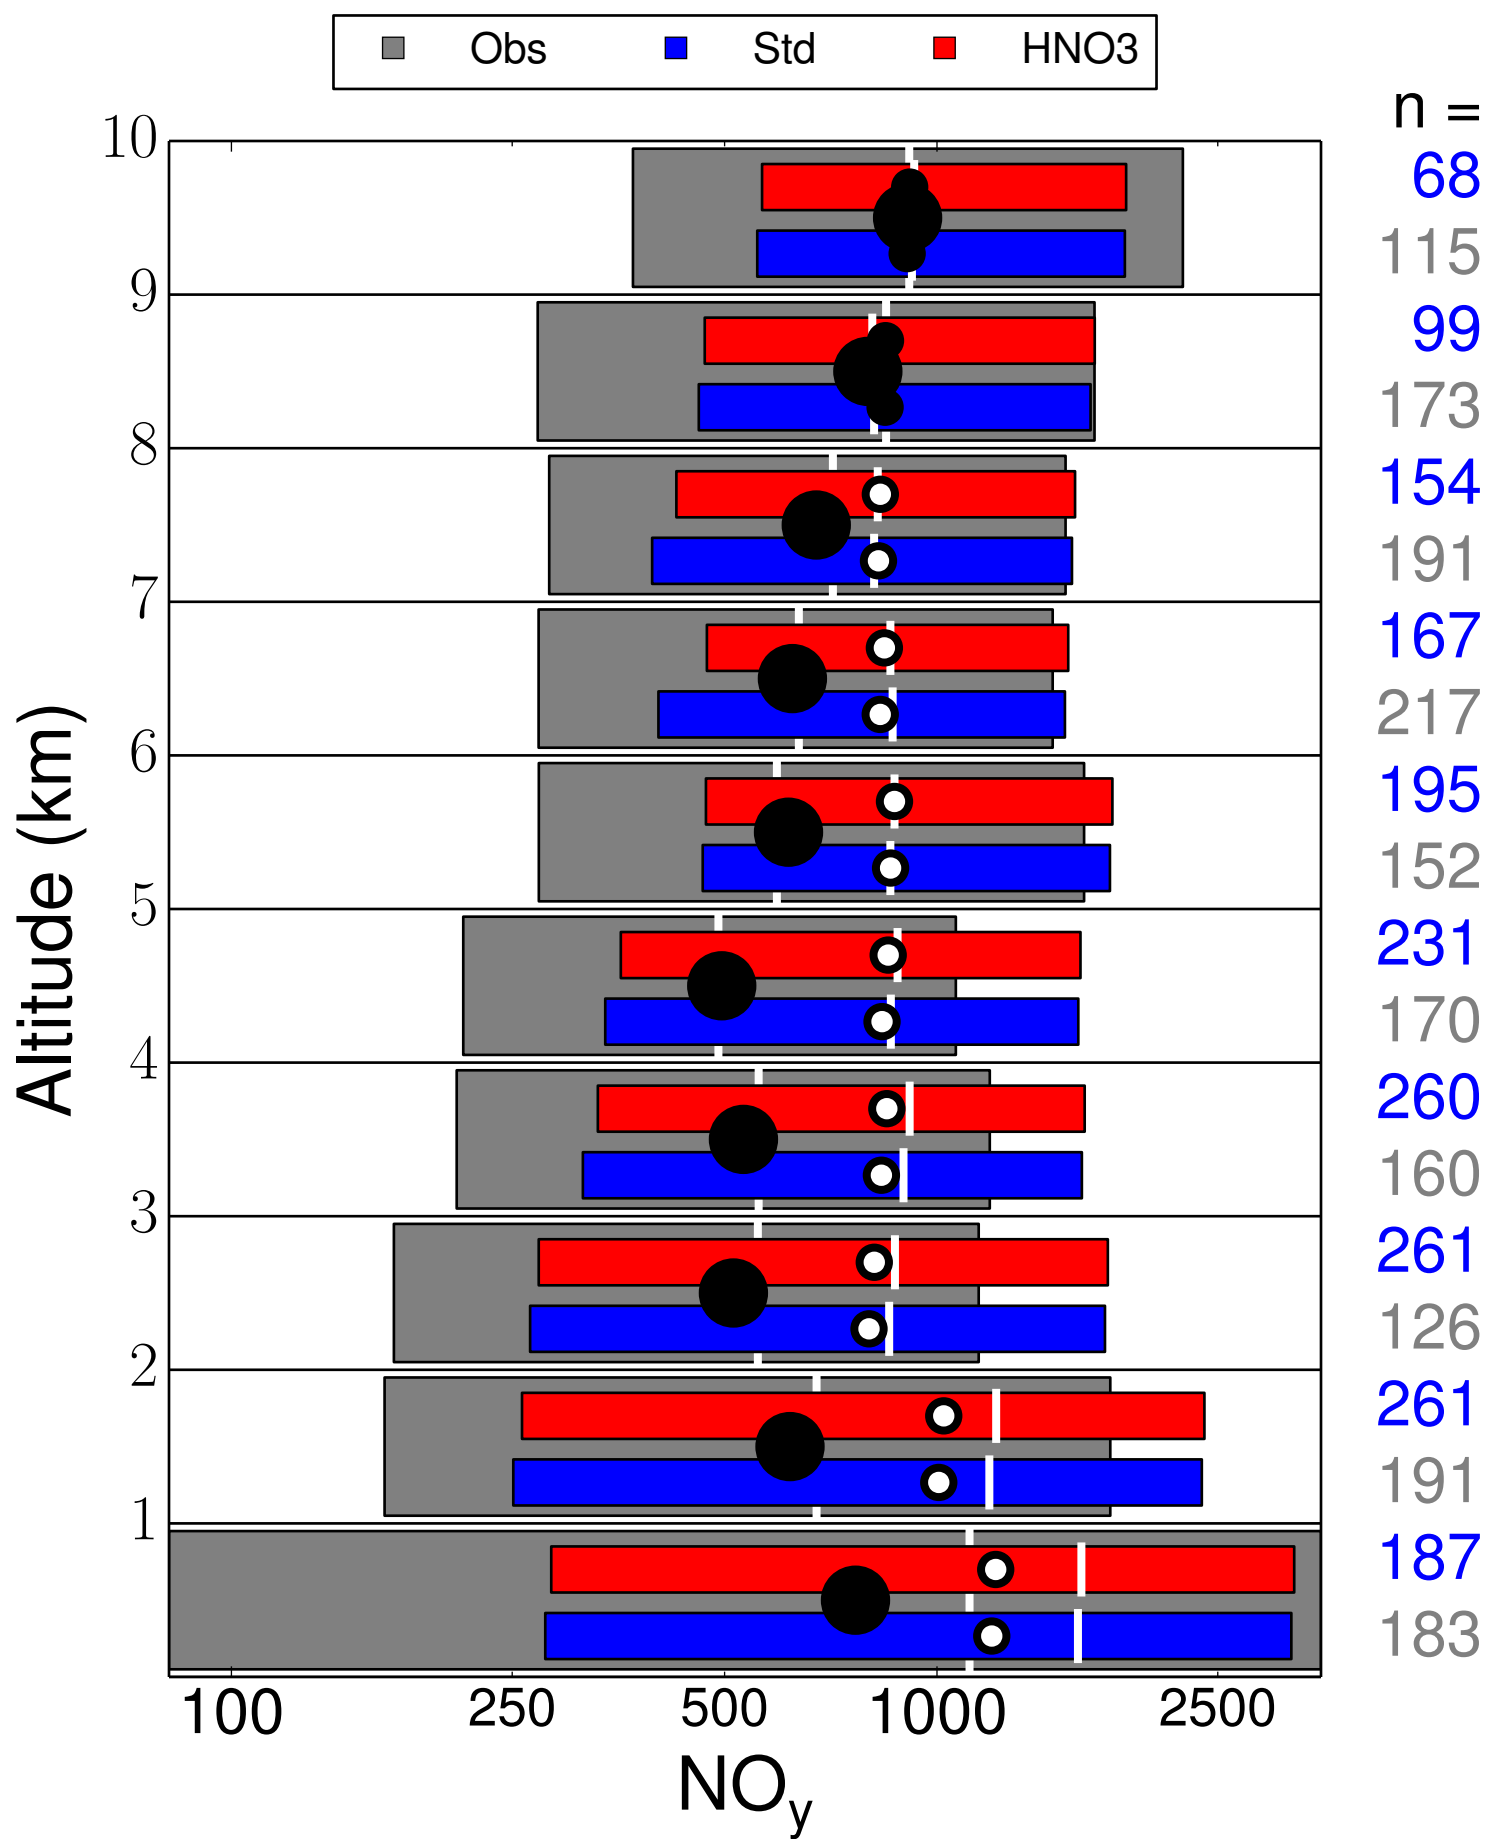

Supplement: Supplementary file 1 [file acp-15-5973-2015-supplement.zip]

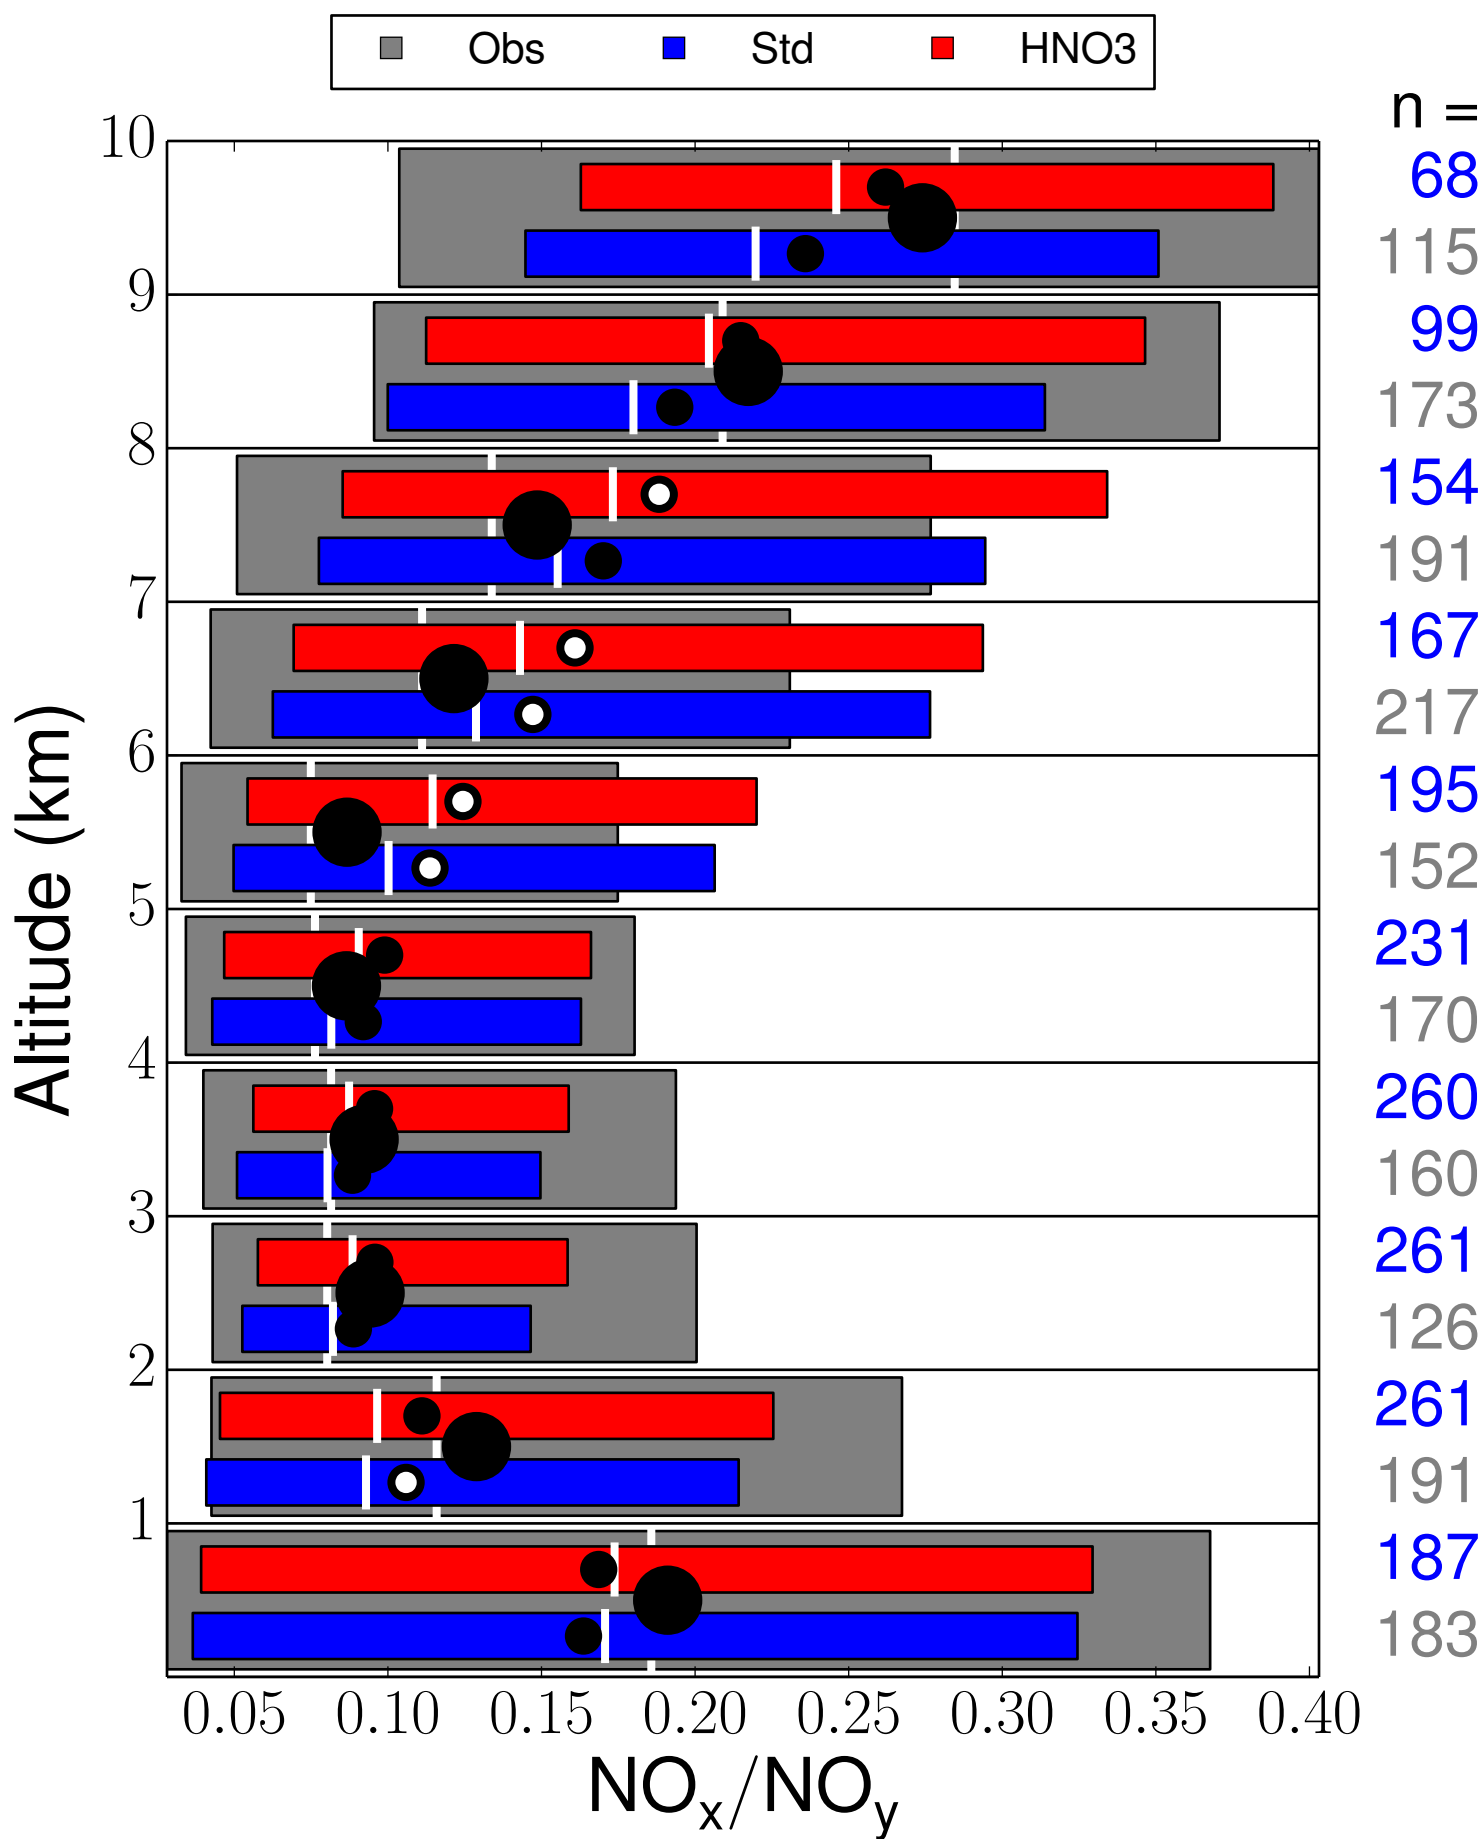

Supplement: Supplementary file 2 [file acp-15-5973-2015-supplement.zip]

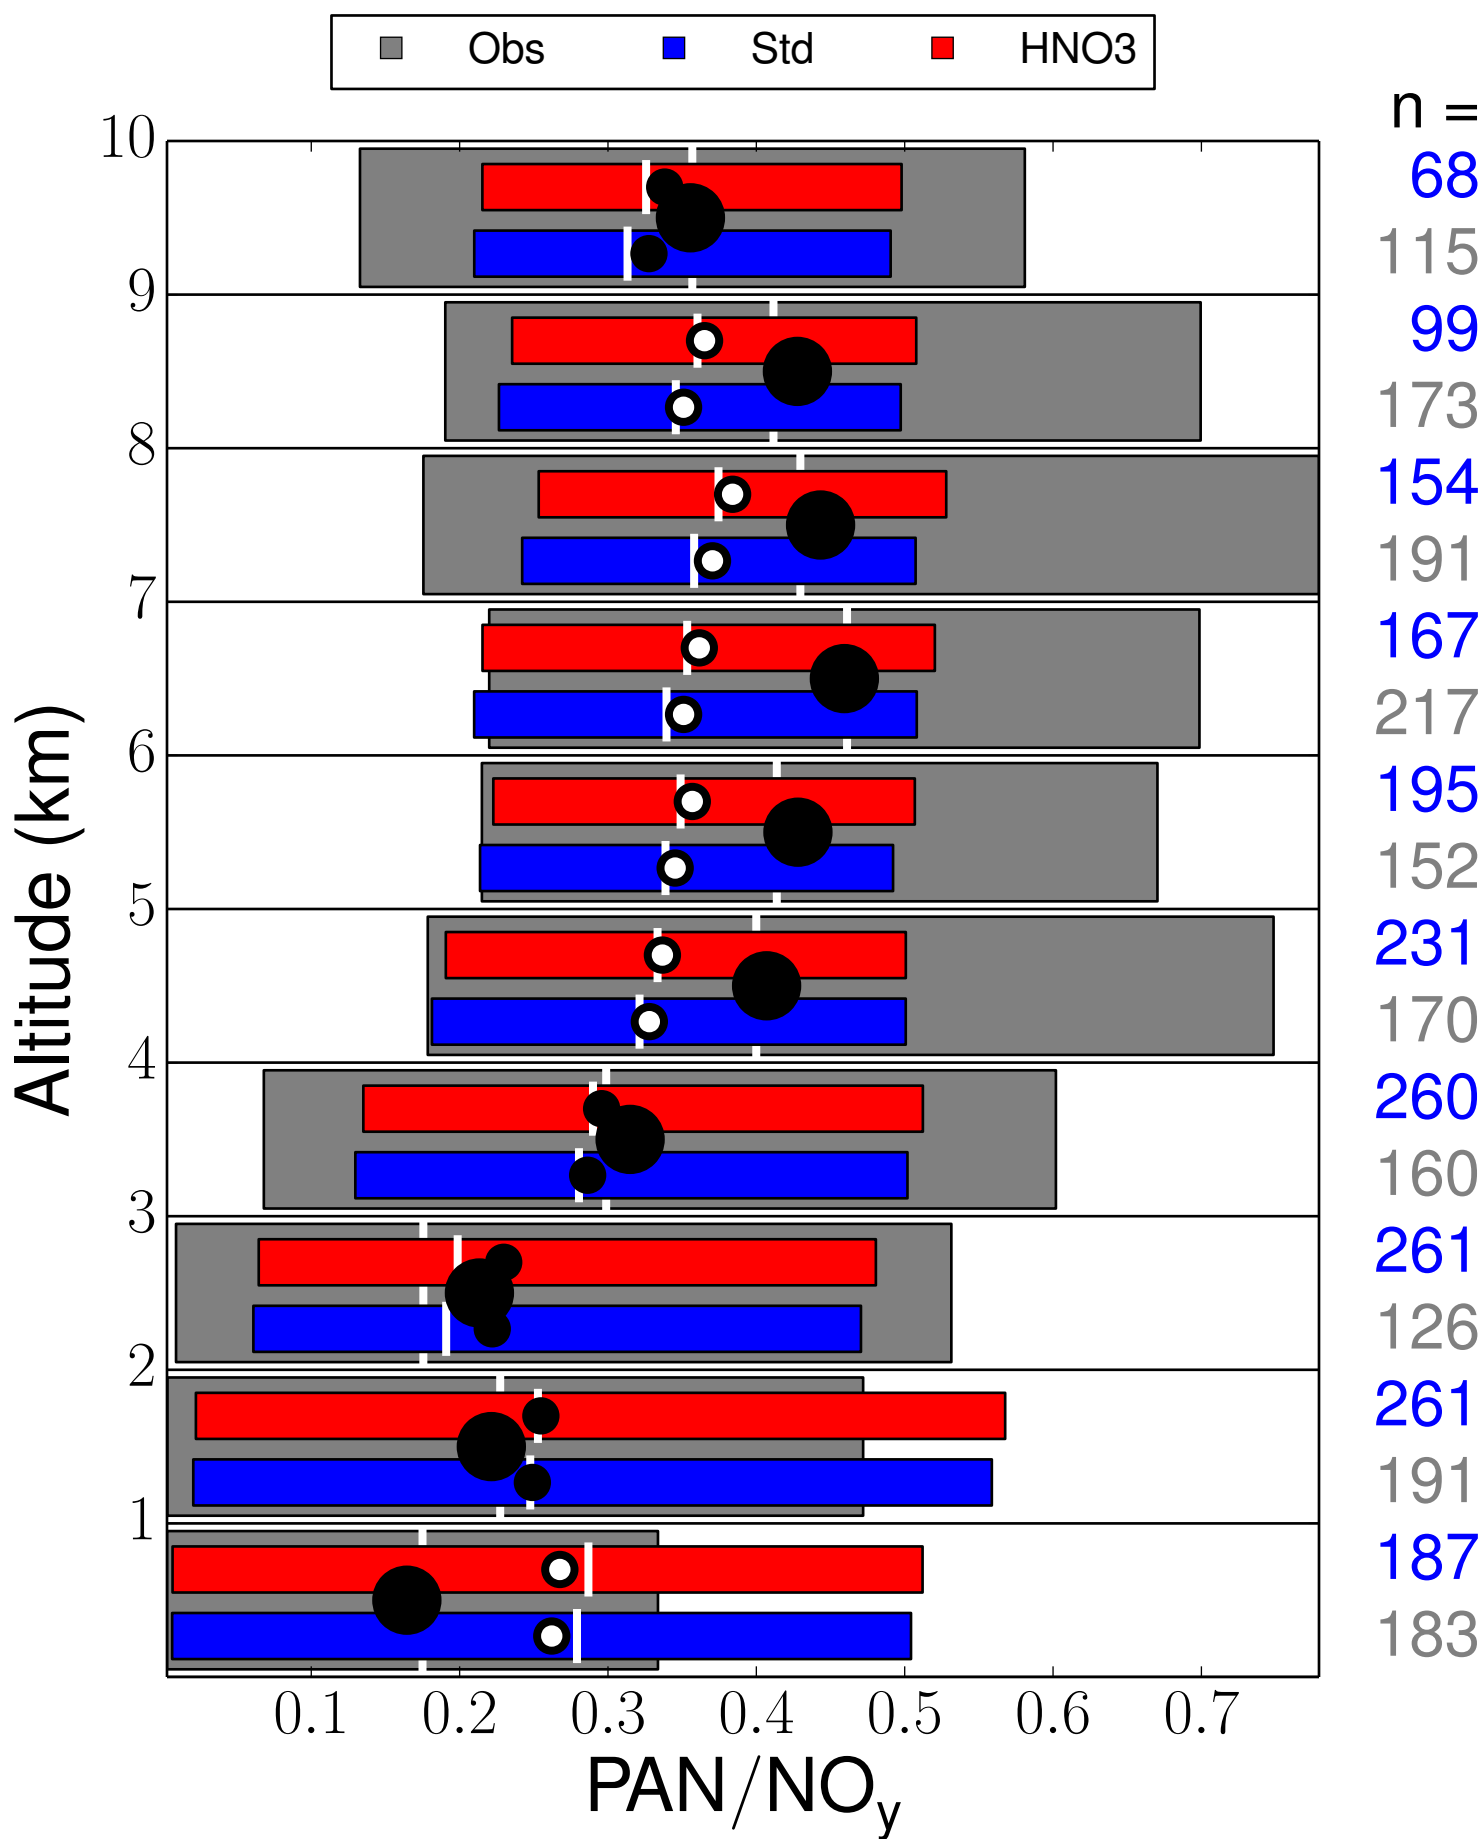

Supplement: Supplementary file 4 [file acp-15-5973-2015-supplement.zip]

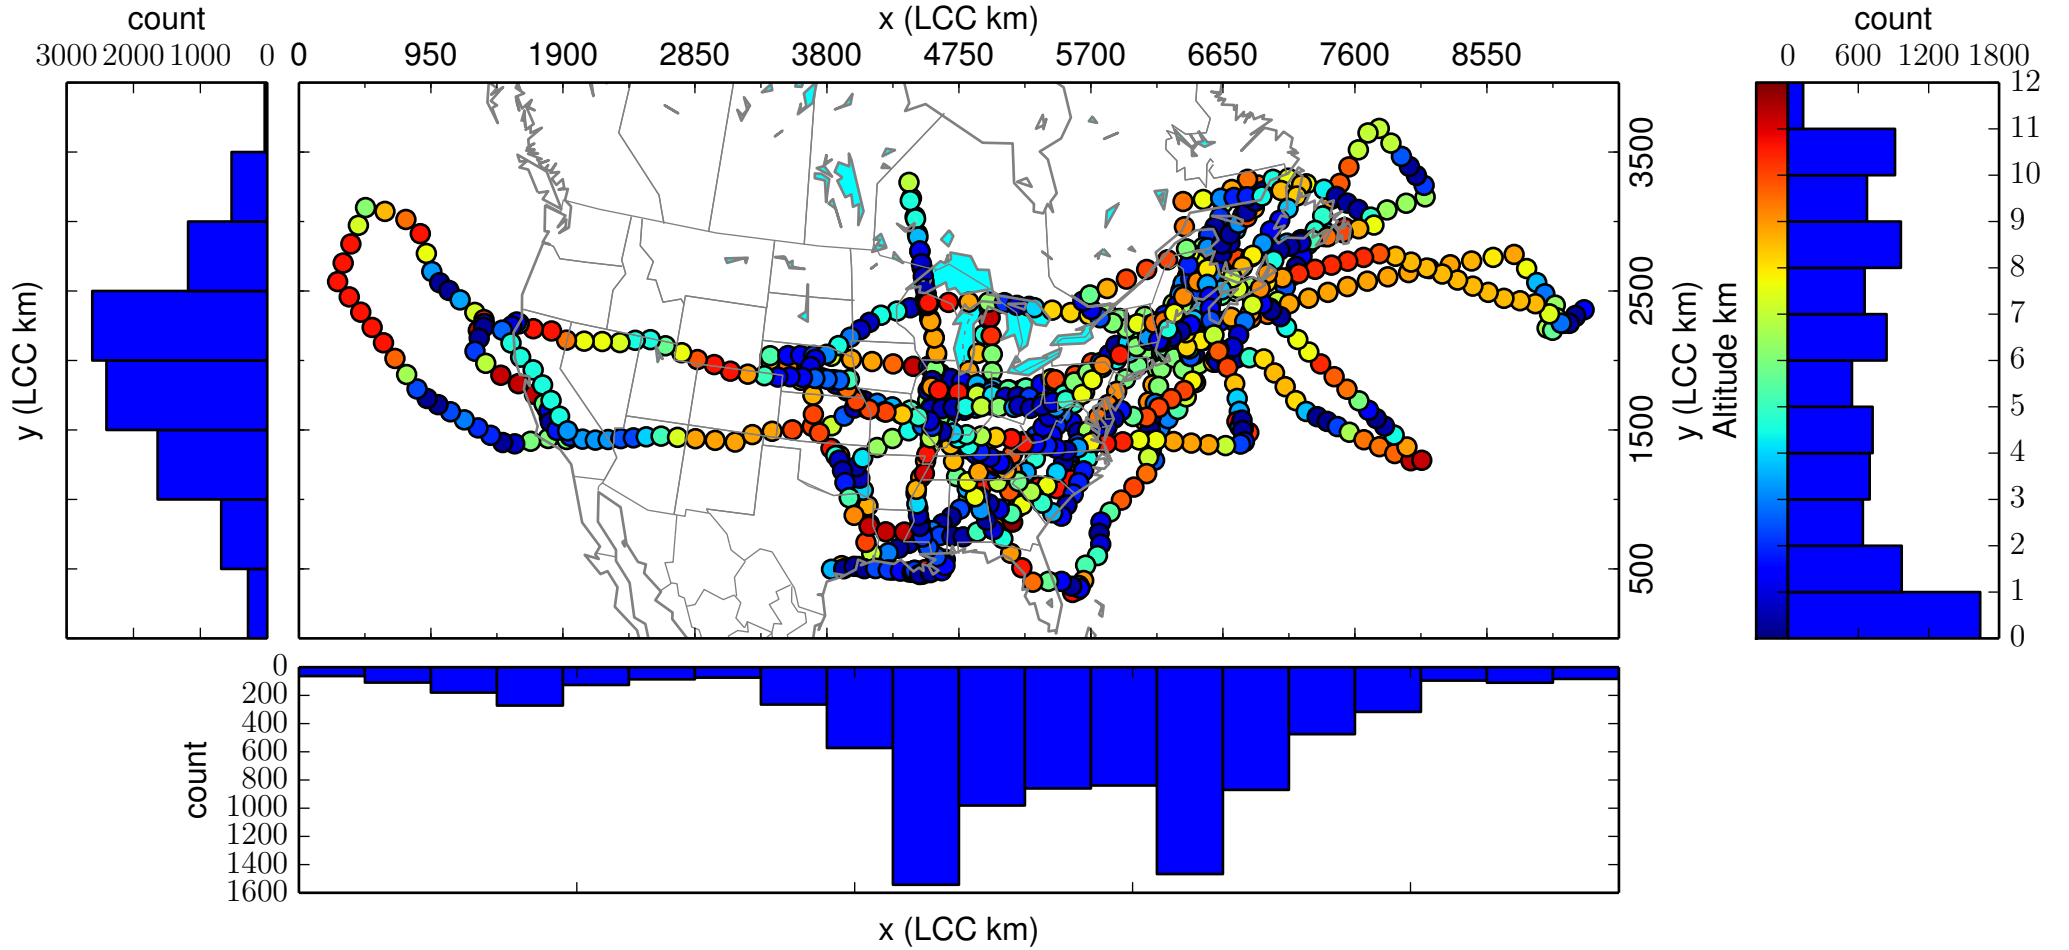

Supplement: Supplementary file 5 [file acp-15-5973-2015-supplement.zip]

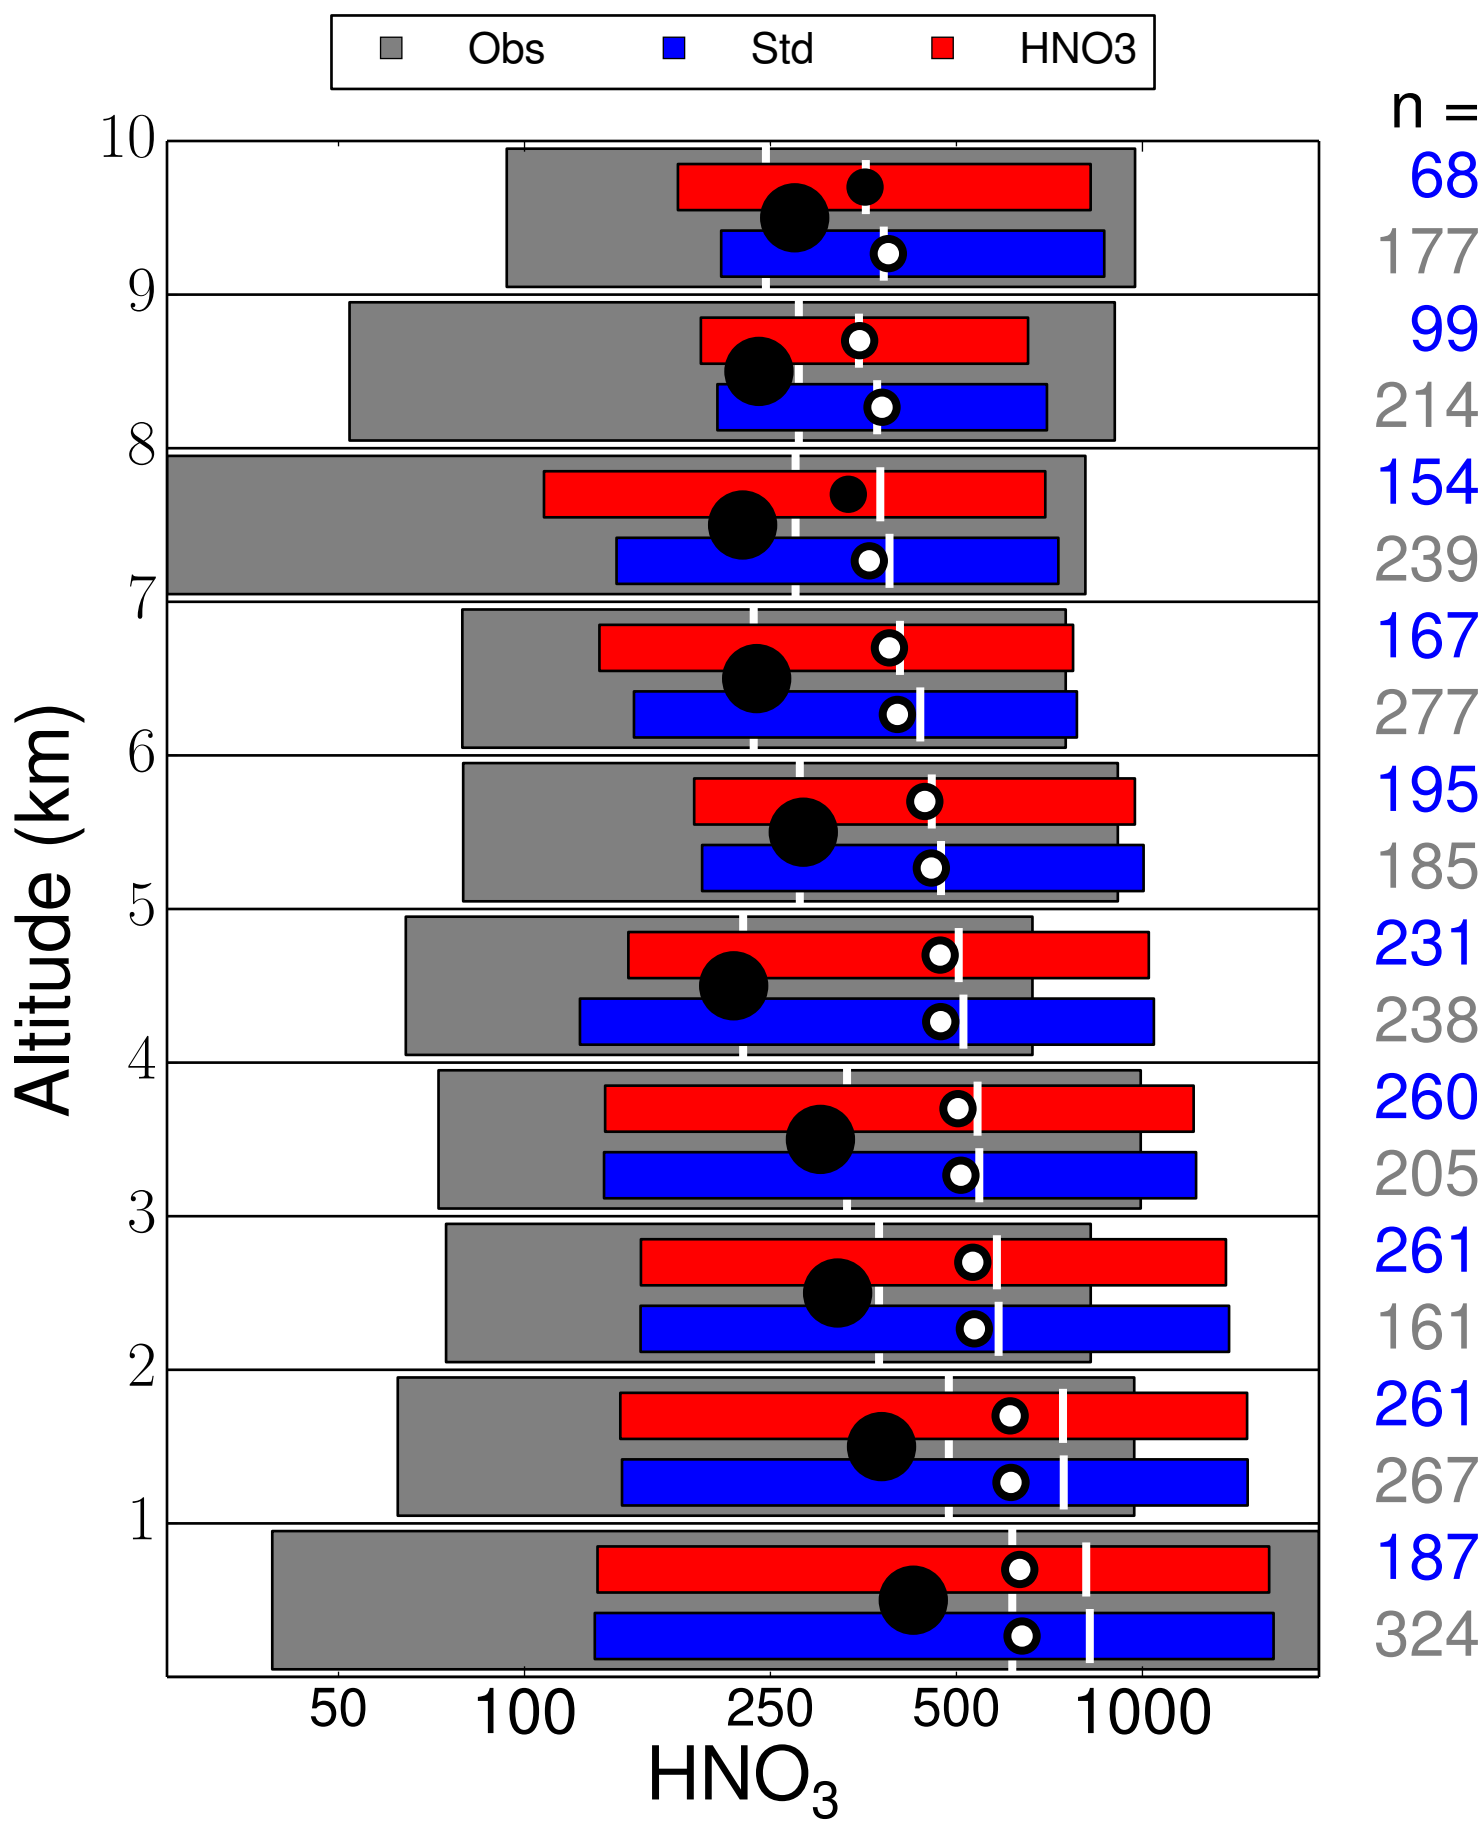

Supplement: Supplementary file 8 [file acp-15-5973-2015-supplement.zip]

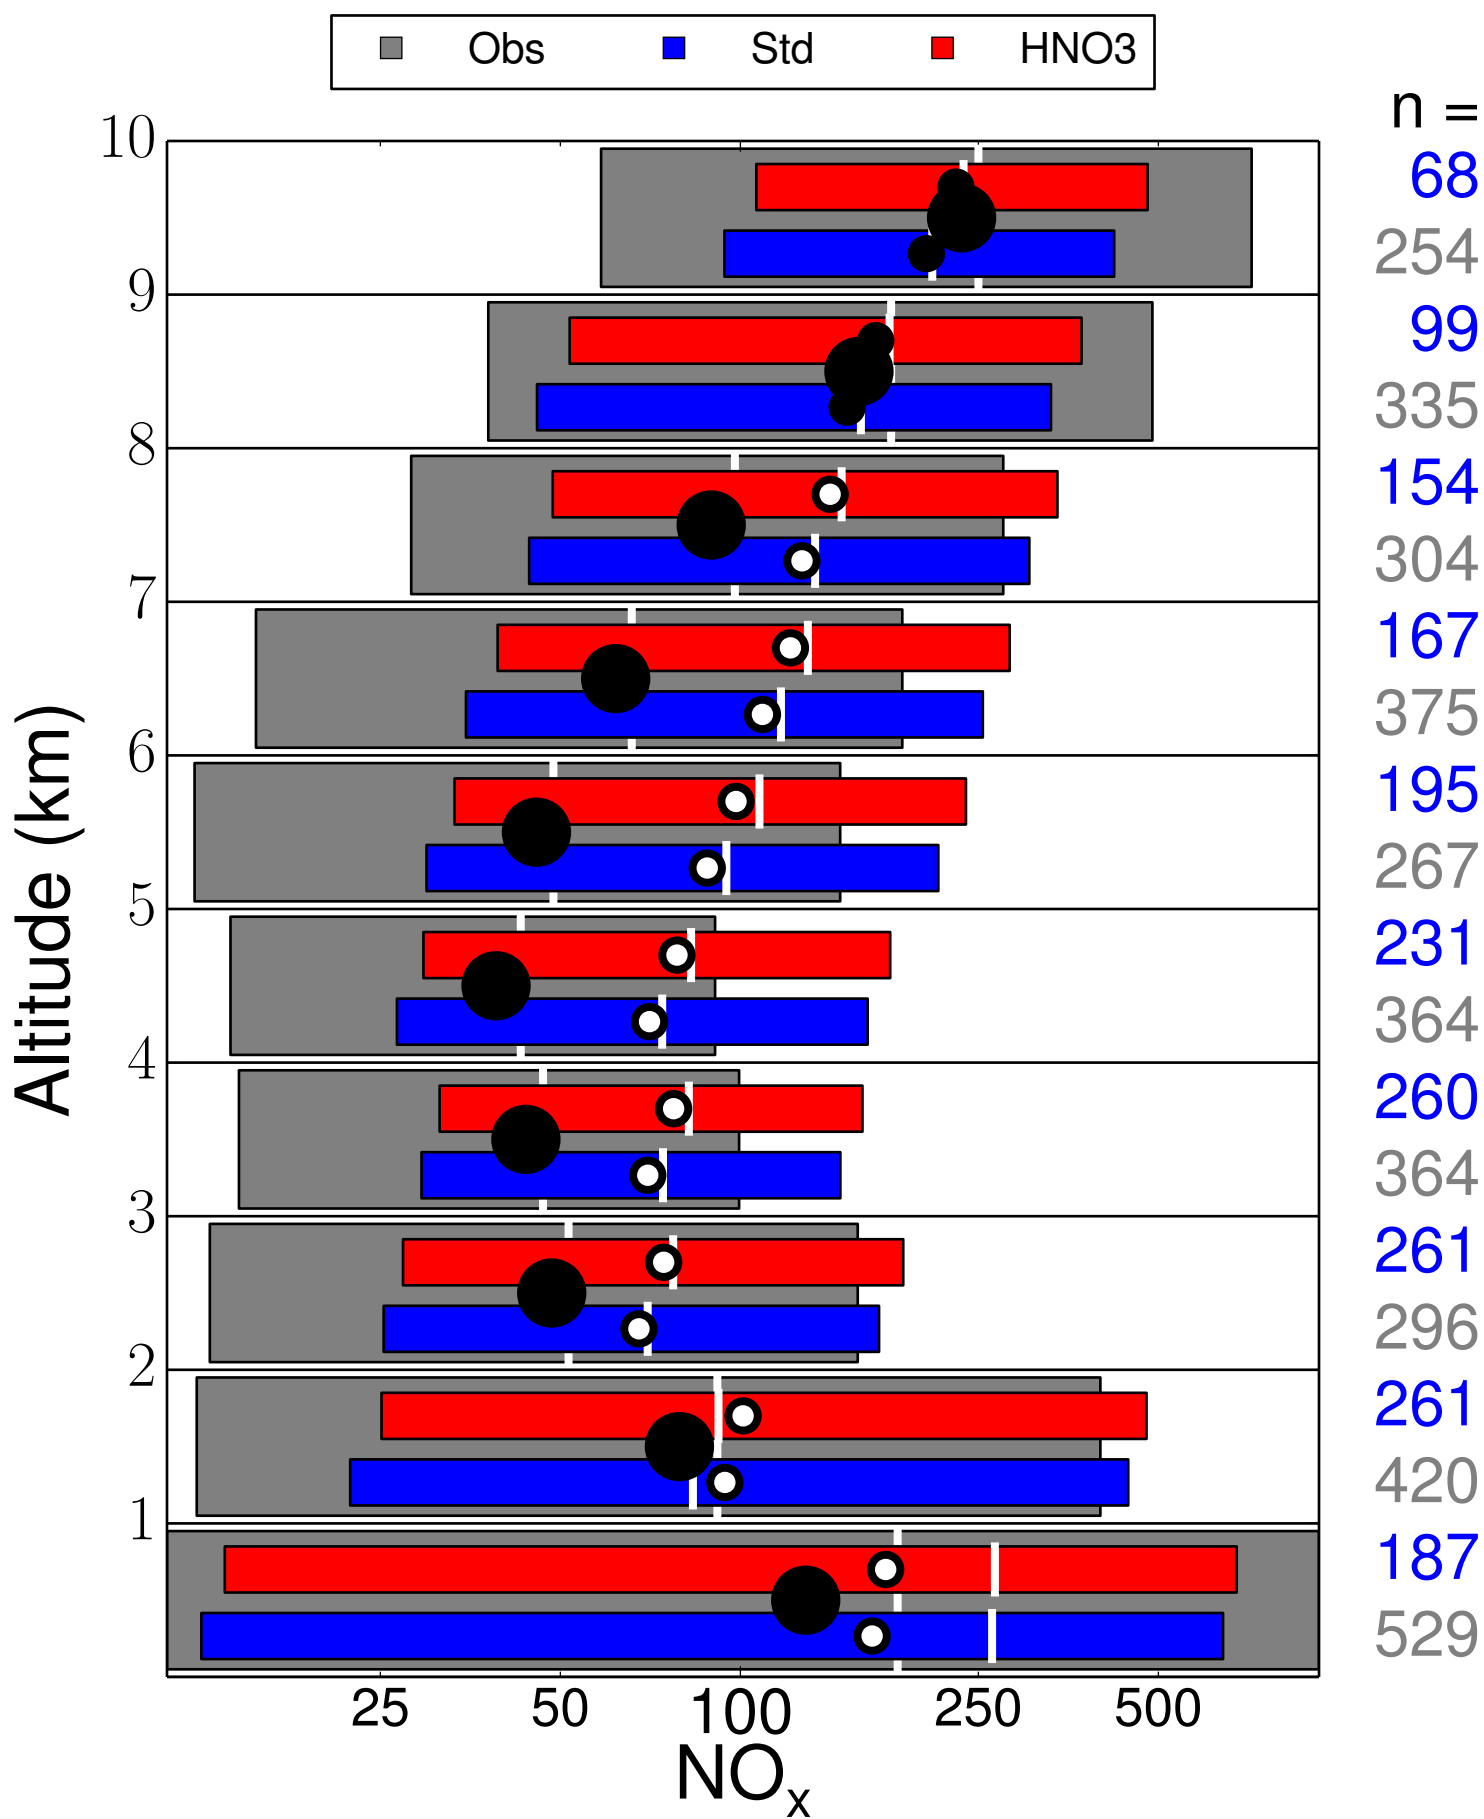

Supplement: Supplementary file 10 [file acp-15-5973-2015-supplement.zip]

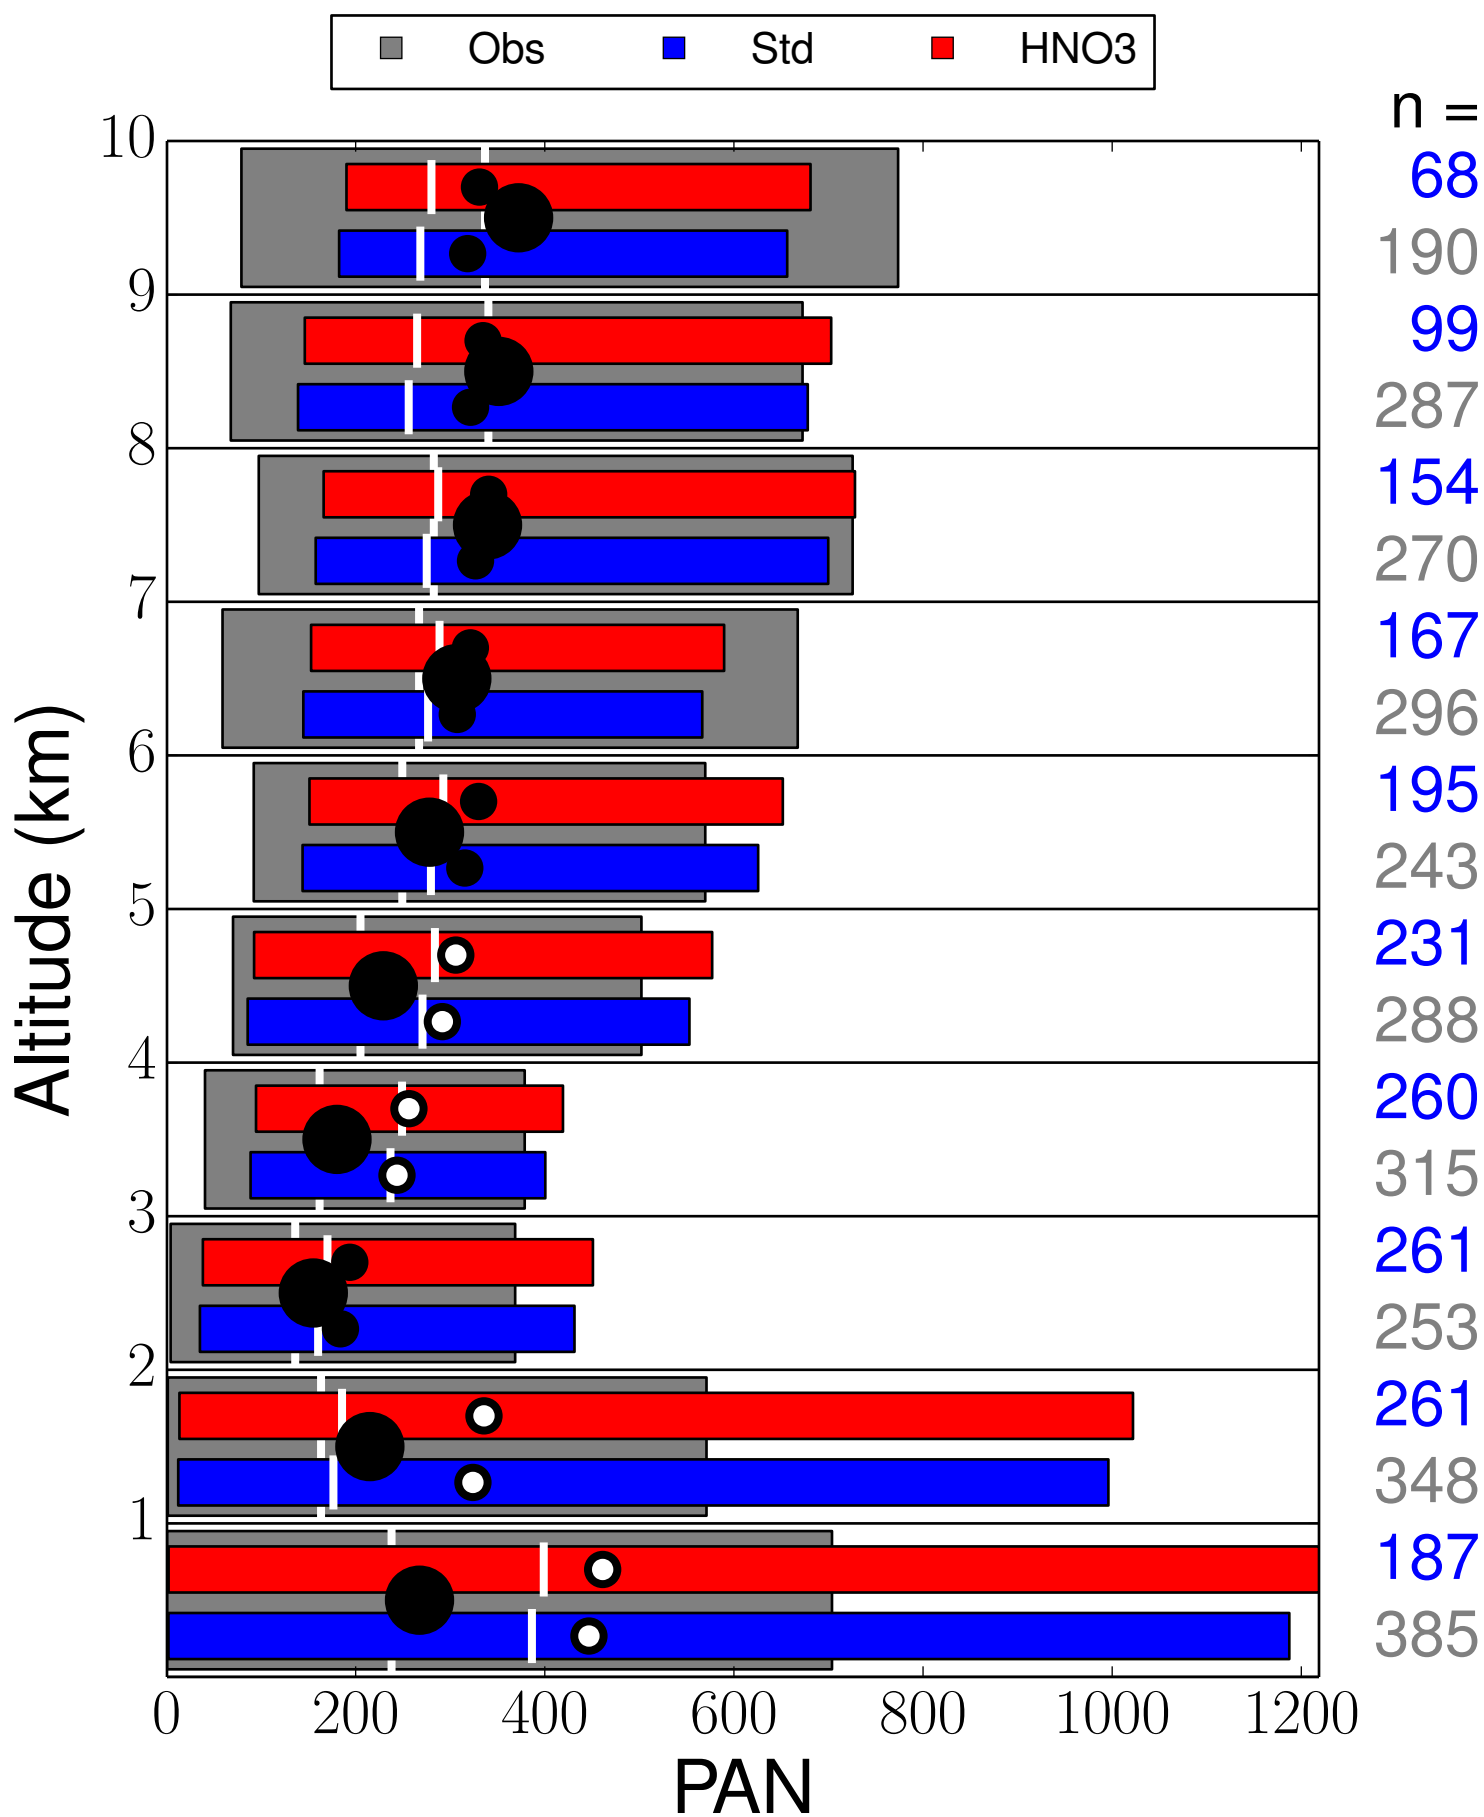

Supplement: Supplementary file 13 [file acp-15-5973-2015-supplement.zip]

Altitude (km)

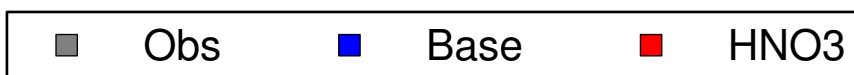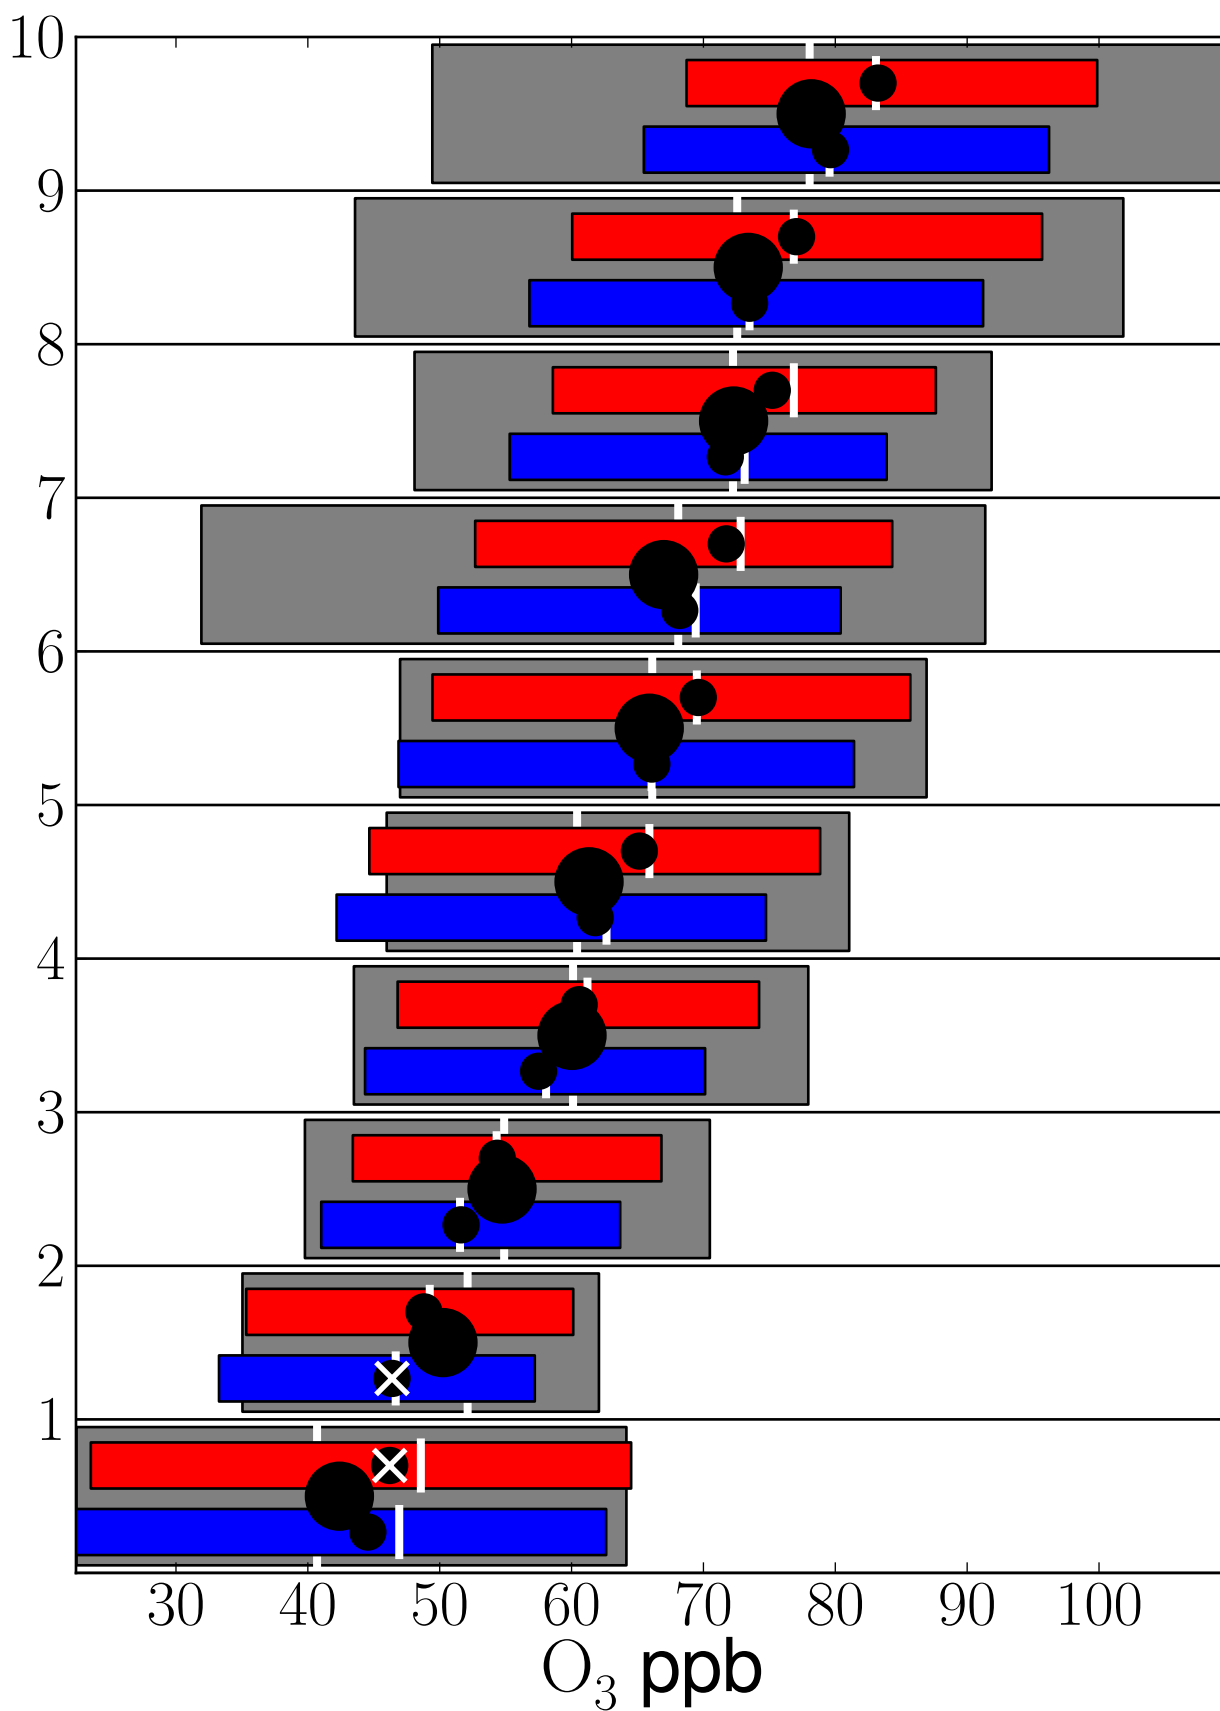

n =  
68  
271  
99  
347  
154  
318  
167  
394  
195  
282  
231  
377  
260  
383  
261  
318  
261  
459  
187  
596

Supplement: Supplementary file 17 [file acp-15-5973-2015-supplement.zip]

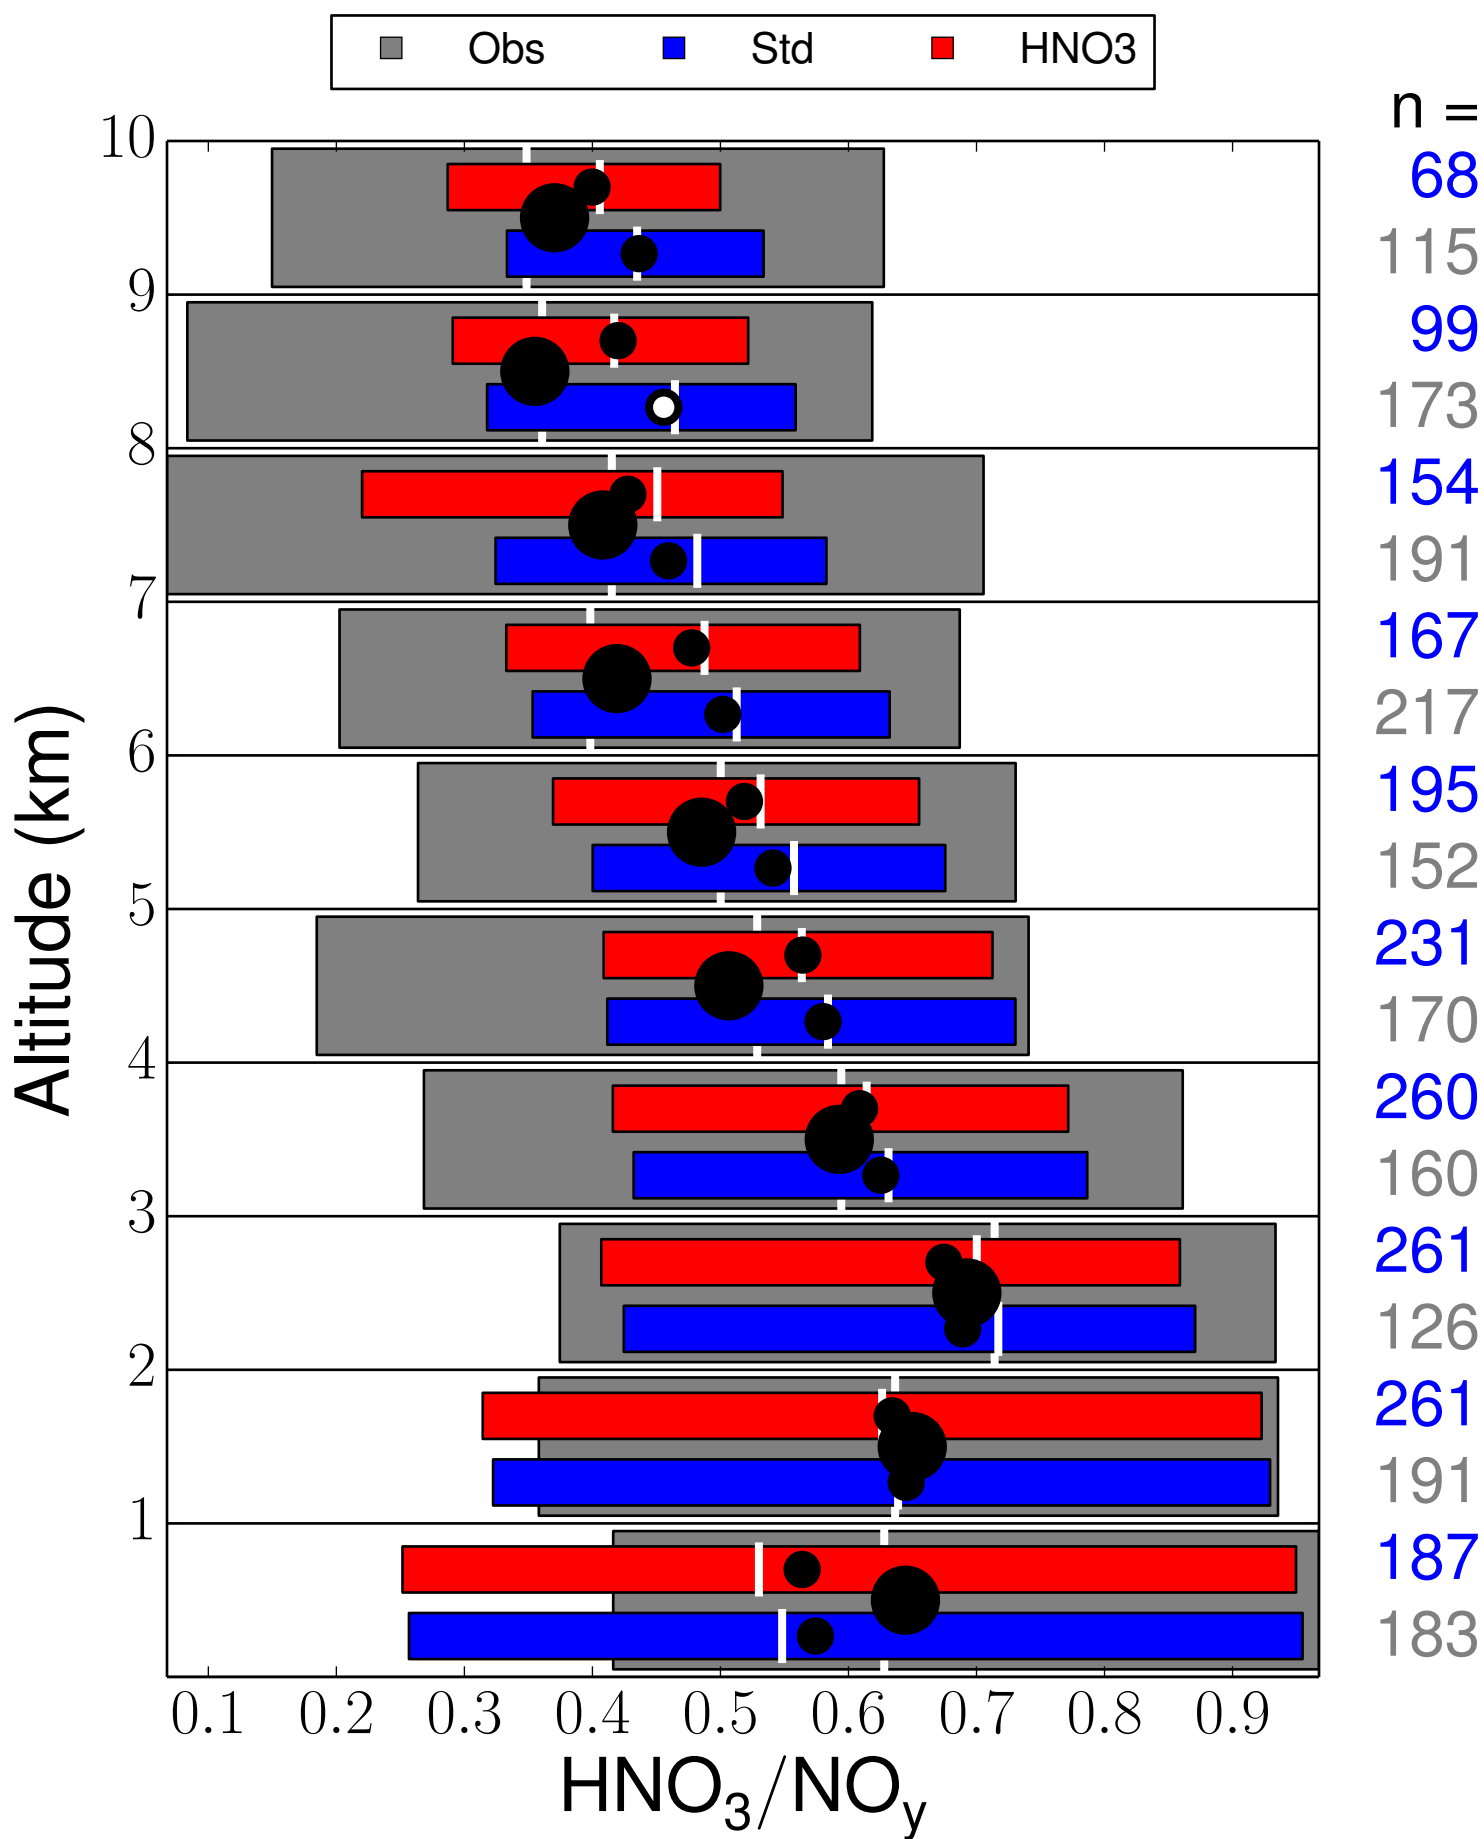

Supplement: Supplementary file 18 [file acp-15-5973-2015-supplement.zip]

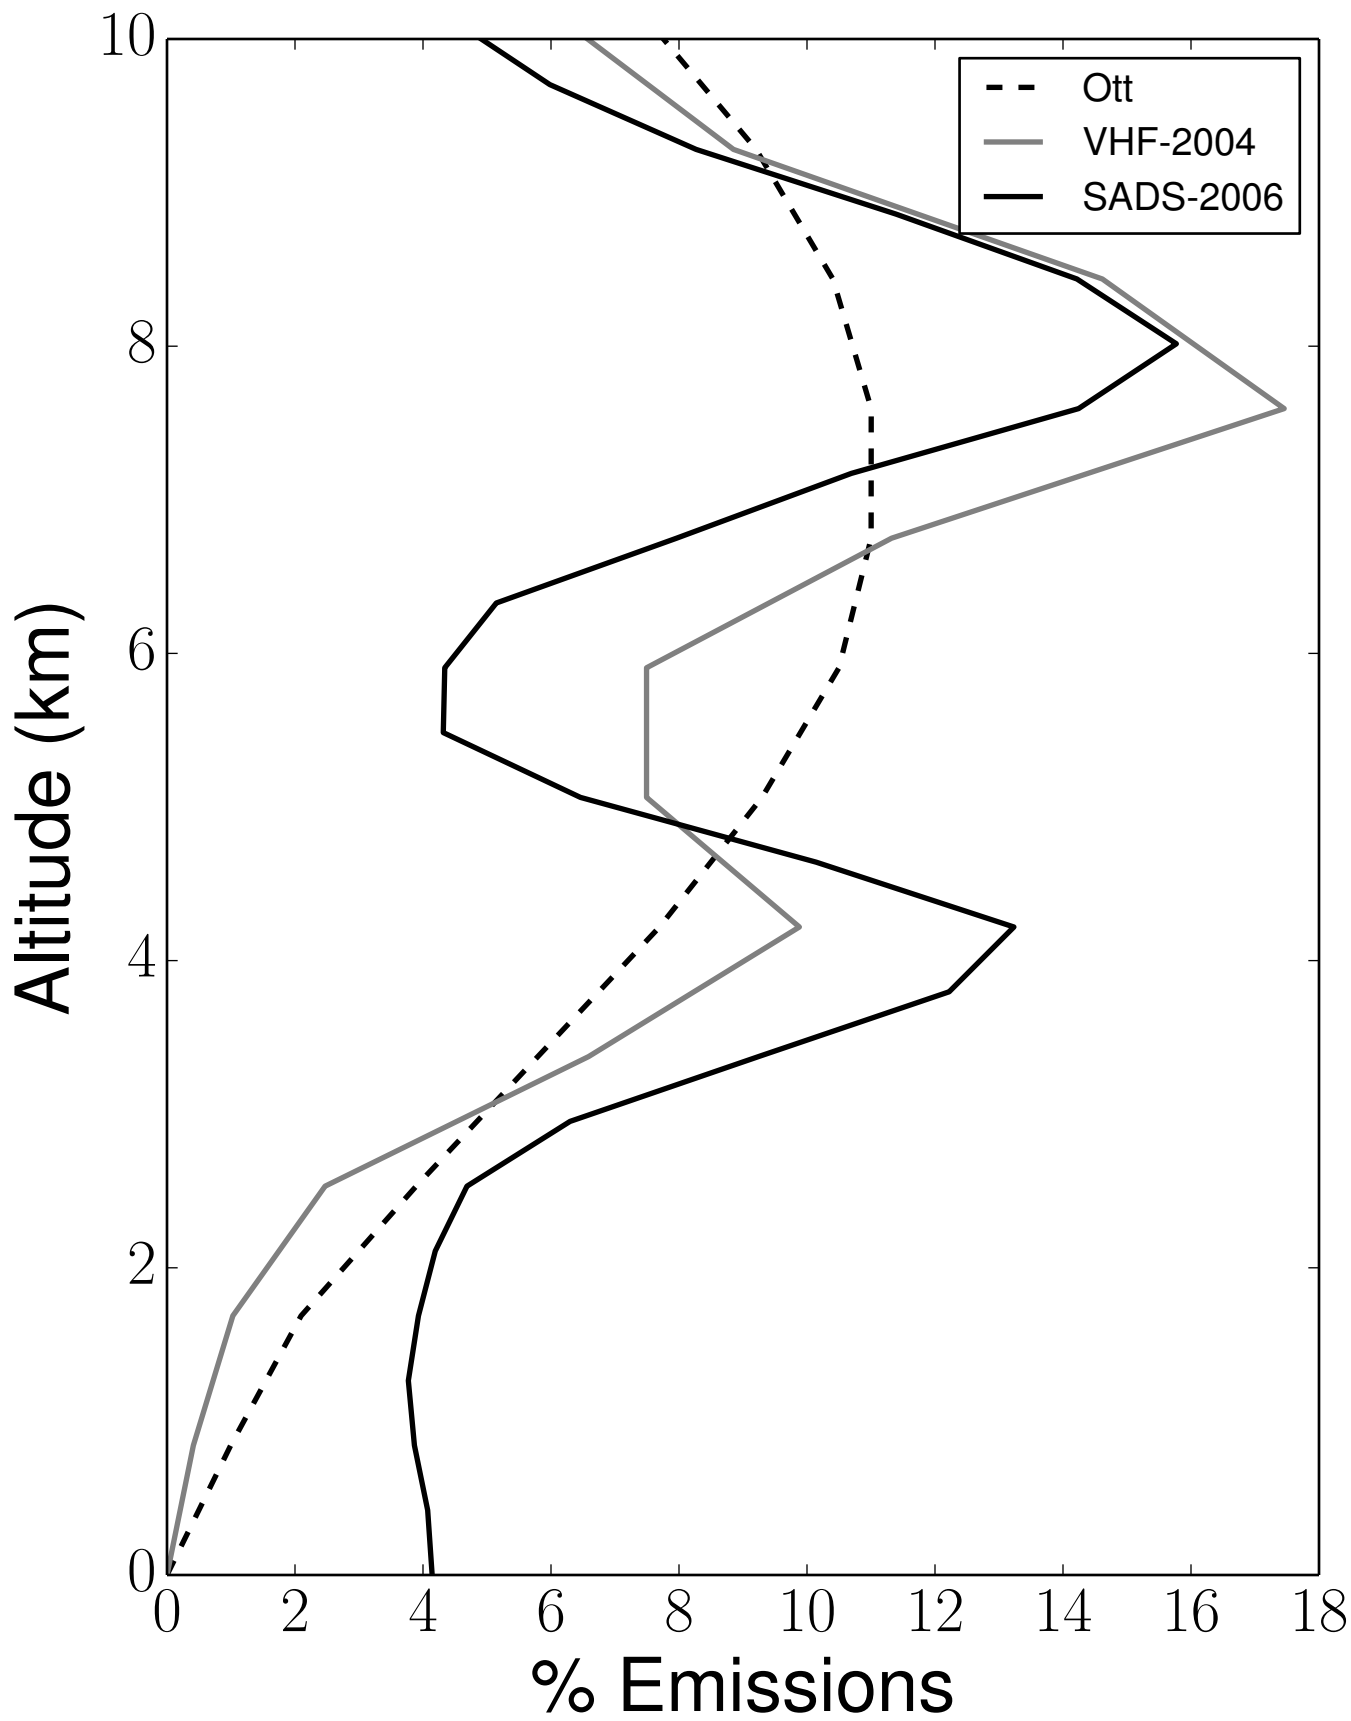

Supplement: Supplementary file 20 [file acp-15-5973-2015-supplement.zip]
